# Supplementary material for: Dysregulation of sphingolipid metabolism contributes to bortezomib-induced neuropathic pain
Source: Oxford University Press journal article supplement (doi:10.1084/jem.20170584), 2018-04-27
Supplement: jem_20170584_sm.pdf [file jem_20170584_sm.pdf]

Supplemental material

Stockstill et al., <https://doi.org/10.1084/jem.20170584>

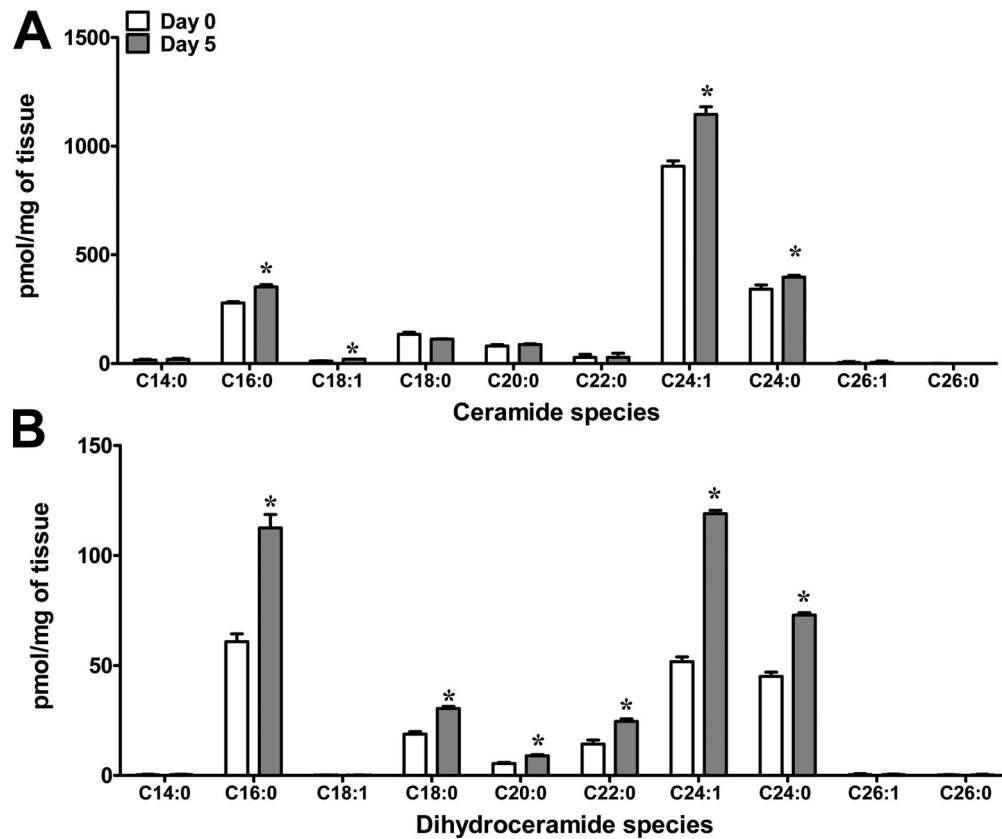

Figure S1. **Bortezomib increases ceramide and dihydroceramide acyl chain species in spinal cord.** Lipids extracted from the DHSC harvested from saline-treated rats (day 0) or bortezomib-treated rats 24 h (day 5) after the last injection of bortezomib were analyzed by LC-ESI-MS/MS (data are representative of two separate experiments). **(A and B)** Spinal levels of individual ceramide (A) and dihydroceramide (B) species are shown. Data are mean  $\pm$  SD for  $n = 4$  per group; \*,  $P < 0.05$  versus day 0 analyzed by Welch's corrected, unpaired, one-tailed Student's  $t$  test. False discovery rate was controlled by Benjamini-Hochberg procedure ( $q < 0.05$ ;  $q^* = 0.027$ ).

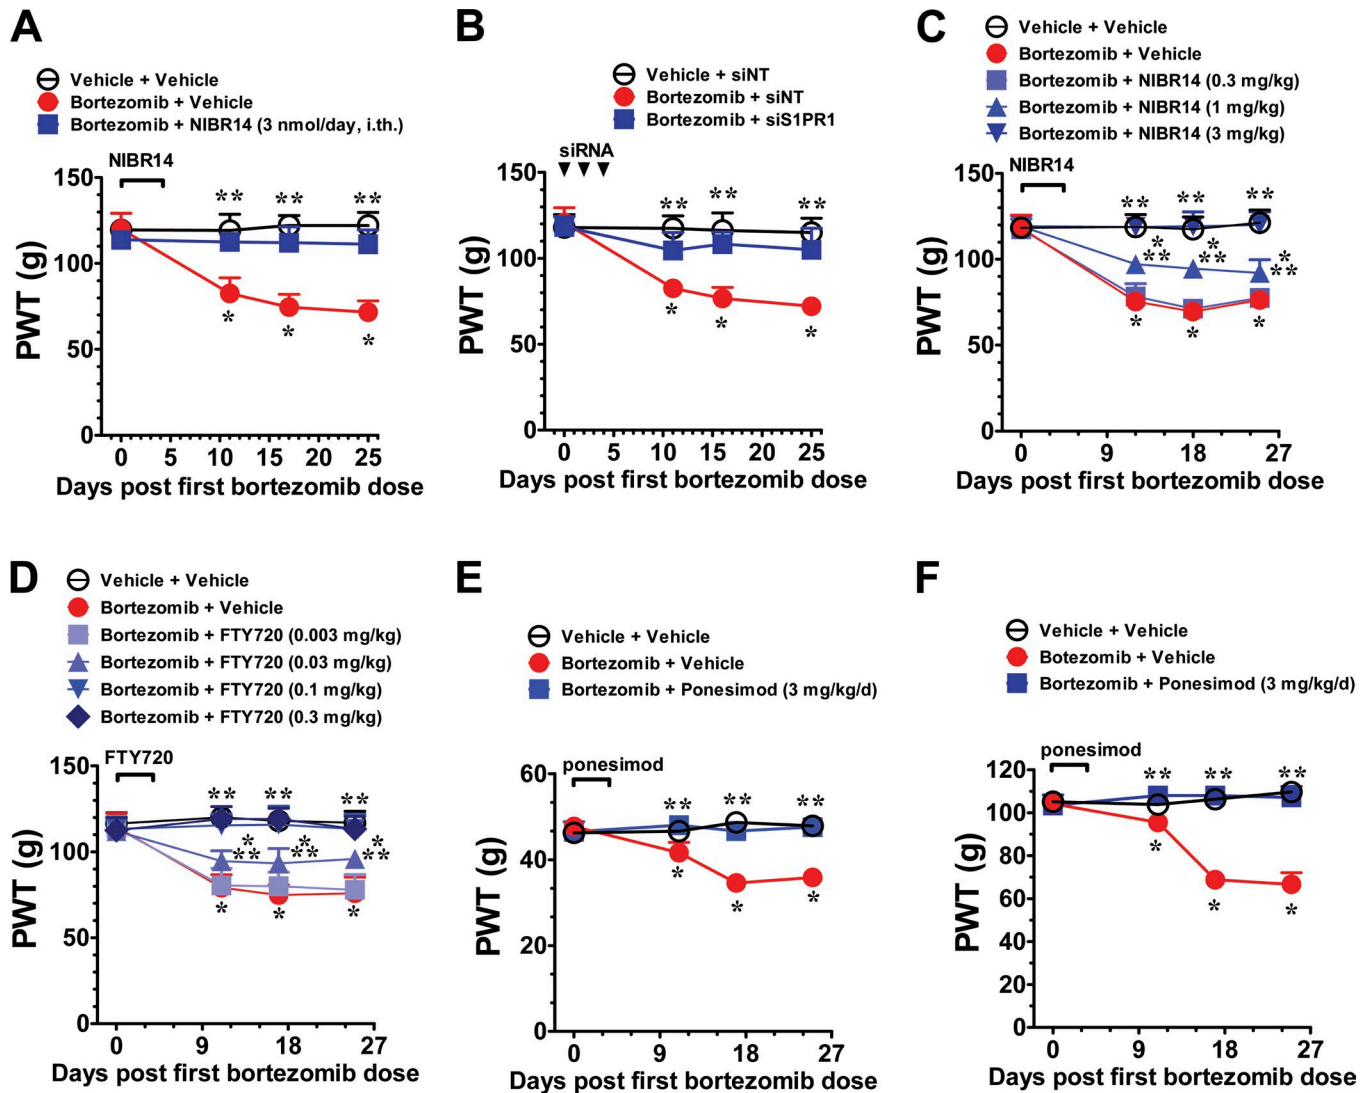

Figure S2. **Targeting S1PR1 prevents bortezomib-induced mechano-hypersensitivity.** (A) Mechano-hyperalgesia was measured in rats treated on days 0–4 with vehicle controls ( $n = 6$ ) or bortezomib and concurrent i.th. NIBR14 (3 nmol/d, days 0–4;  $n = 6$ ) or vehicle (10% DMSO;  $n = 6$ ). (B) Mechano-hyperalgesia was measured in rats treated on days 0–4 with bortezomib and concurrent i.th. *S1pr1*-targeting (siS1PR1) or nontargeting (siNT) DsiRNA (2  $\mu$ g/d on days 0, 2, and 4;  $n = 6$  per group). Control groups were treated with bortezomib vehicle with siNT ( $n = 6$ ). Pilot studies showed that i.th. NIBR14 or *S1pr1*-targeting DsiRNA had no effect on PWT in vehicle-treated rats (not depicted). (C and D) Mechano-hyperalgesia was measured in rats treated with bortezomib (days 0–4) and concurrent oral NIBR14 (0.3, 1, or 3 mg/kg/d;  $n = 6$  per group; C), oral FTY720 (0.003, 0.03, or 0.1 mg/kg/d,  $n = 6$  per group, or 0.3 mg/kg/d,  $n = 3$ , D) or their vehicle (2% DMSO in saline;  $n = 7$ , C; or  $n = 11$ , D). Control groups were treated with bortezomib vehicle and concurrent test agent vehicle ( $n = 6$ , C; or  $n = 9$ , D). (E and F) Mechano-allodynia (E) and mechano-hyperalgesia (F) were measured in rats treated on days 0–4 with bortezomib and concurrent oral administration (days 0–4) of ponesimod (3 mg/kg/d,  $n = 6$ ) or its vehicle ( $n = 6$ ). Control groups were treated with bortezomib vehicle and concurrent test agent vehicle ( $n = 6$ ). Data are mean  $\pm$  SD for  $n$  animals; \*,  $P < 0.05$  versus day 0; \*\*,  $P < 0.05$  versus time-matched bortezomib plus vehicle or bortezomib plus siNT by two-way ANOVA with Holm-Sidak.

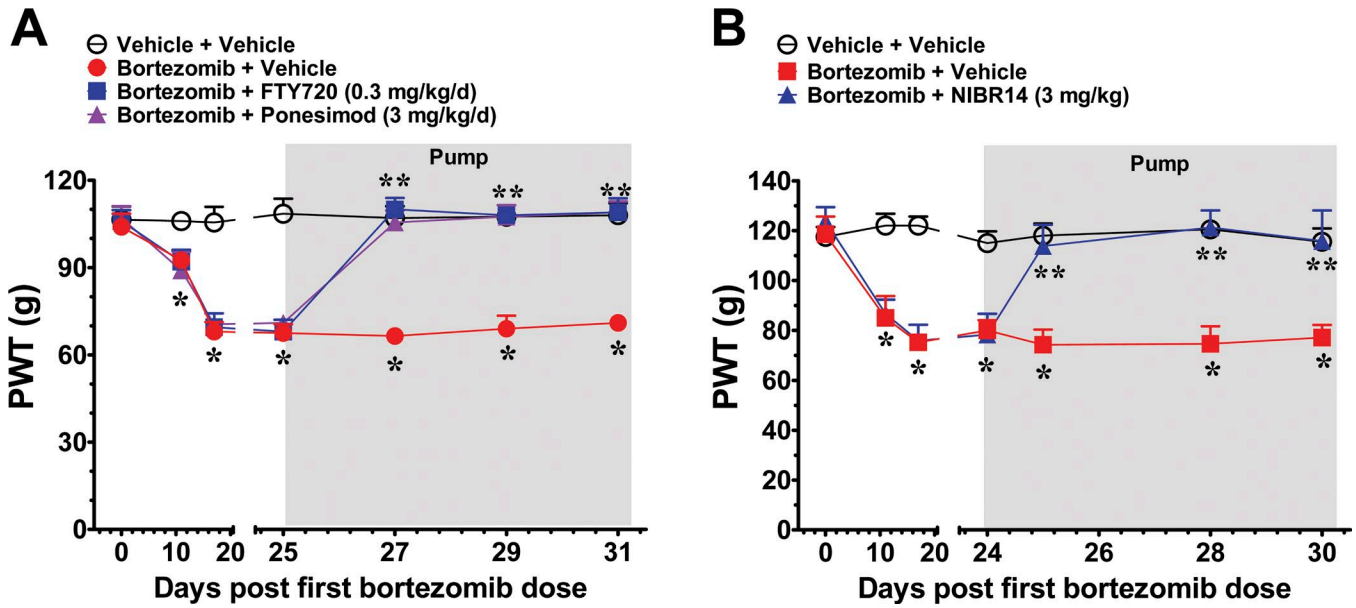

Figure S3. **Targeting S1PR1 reverses bortezomib-induced mechano-hyperalgesia.** On days 24 or 25 after bortezomib, 7-d minipumps were implanted to deliver continuous subcutaneous infusion of vehicle ( $n = 5$ , A; or  $n = 7$ , B), FTY720 (0.3 mg/kg/d,  $n = 5$ , A), ponesimod (3 mg/kg/d,  $n = 5$ , B), or NIBR14 (0.3 mg/kg/d,  $n = 6$ , B). Control rats were treated with bortezomib and test compound vehicles (3–10% DMSO in saline,  $n = 5$ , A and B). Rats were injected immediately after minipump implantation with a respective loading i.p. dose of FTY720 (0.03 mg/kg), ponesimod (3 mg/kg), NIBR14 (3 mg/kg), or vehicle. Data are mean  $\pm$  SD for  $n$  rats; \*,  $P < 0.05$  versus day 0; \*\*,  $P < 0.05$  versus day 24 or 25 by two-way ANOVA with Holm-Sidak.
